# Supplementary material for: Computational identification of transcription factor binding sites by functional analysis of sets of genes sharing overrep-resented upstream motifs
Source: Springer Nature journal article supplement (doi:10.1186/1471-2105-5-57), 2004-05-11

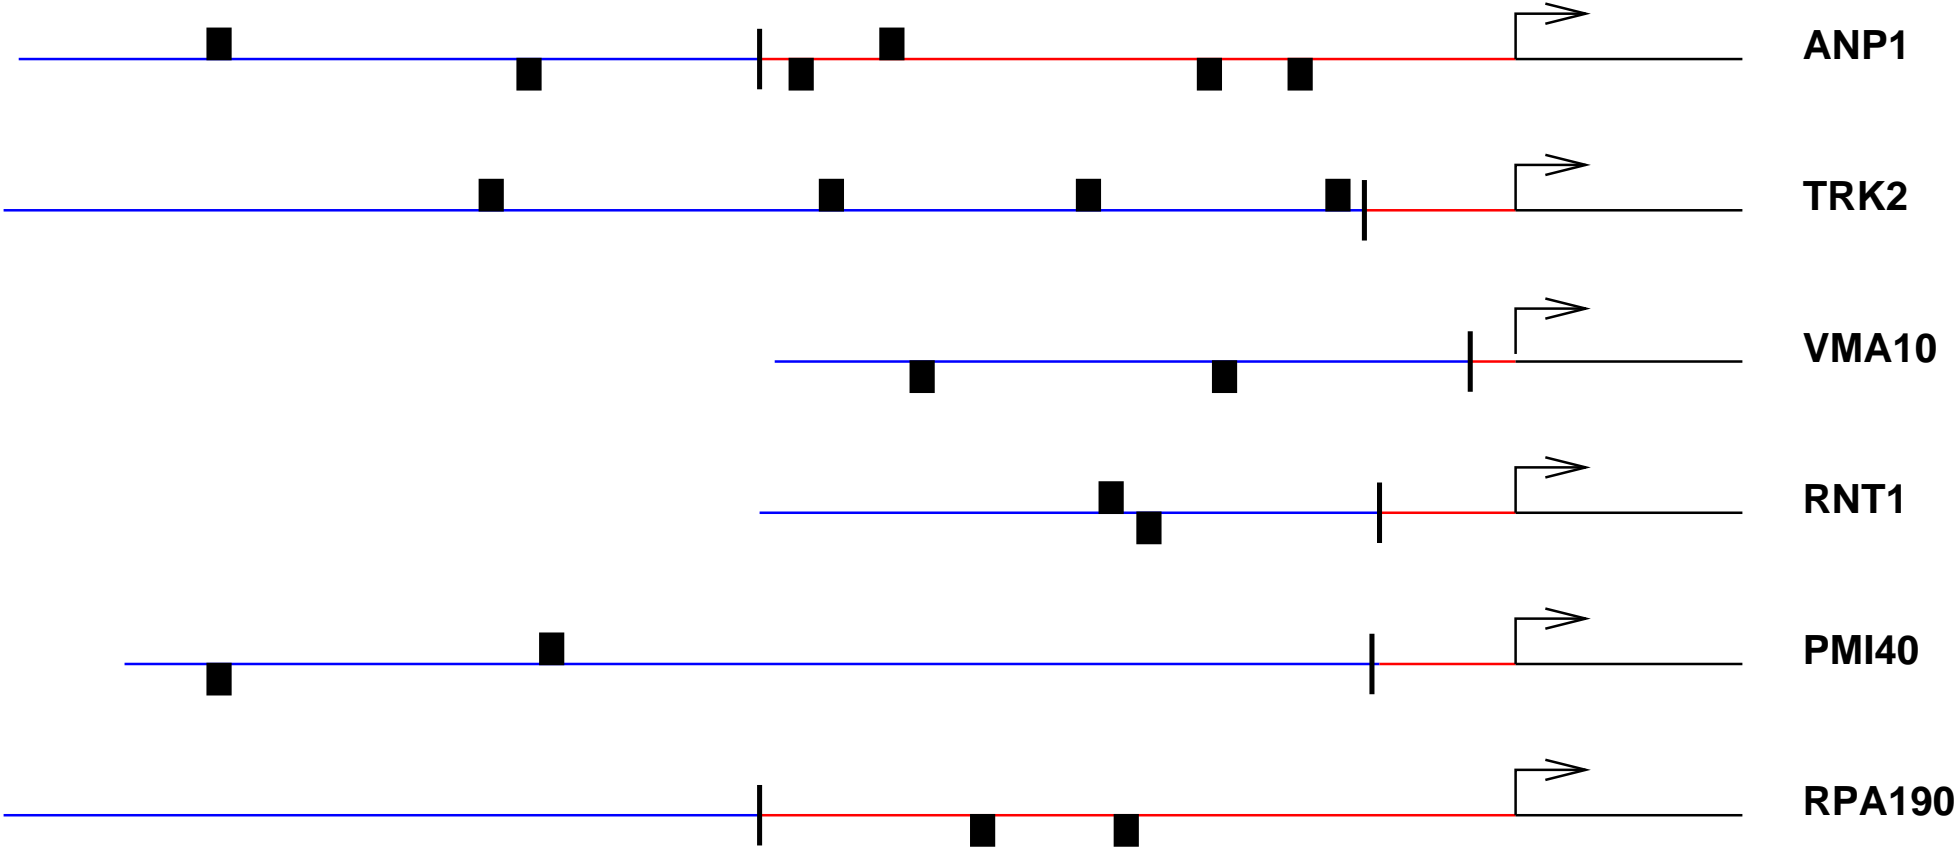

Supplement: 12859_2003_173_MOESM4_ESM.pdf [file 12859_2003_173_MOESM4_ESM.pdf]
